# Supplementary material for: Surface Topography, Microbial Adhesion, and Immune Responses in Silicone Mammary Implant-Associated Capsular Fibrosis
Source: Preprints.org preprint supplement (doi:10.20944/preprints202401.2166.v1), 2024-01-31
Supplement: Supplementary file 1 [file Table S1 AMPs in WBF.xlsx]

## Sheet: Table 1 WBF AMP reasponse
			Ratio (Median all Patients; n=7)
			Plasma	SMI_ 4 µm					SMI_ 60 µm
Accession	Description	Gene name	Abundance Ratio: (Plasma) / (Std)	Abundance Ratio: (1) / (Std)	Abundance Ratio: (2) / (Std)	Abundance Ratio: (3) / (Std)	Abundance Ratio: (4) / (Std)	Abundance Ratio: (5) / (Std)	Abundance Ratio: (6) / (Std)	Abundance Ratio: (7) / (Std)	Abundance Ratio: (8) / (Std)	Abundance Ratio: (9) / (Std)	Abundance Ratio: (10) / (Std)
P09382	Galectin-1	LGALS1	0.133	1.445	1.018	0.852	0.759	0.795	1.514	1.09	0.79	0.725	0.763
P47929	Galectin-7	LGALS7B	0.767	0.805	0.968	0.946	0.862	1.245	0.97	0.996	0.9	0.892	0.872
P17931	Galectin-3	LGALS3	1.00927	1.157	0.906	1.137			0.788	0.834
P23528	Cofilin-1	CFL1	0.197	1.127	1.173	1.099	0.926	0.819	1.163	1.337	0.899	0.851	0.893
Q5D862	Filaggrin-2	FLG2	0.7	0.86	0.906	0.746	0.831	1.293	0	0	0	0	0
P20930	Filaggrin	FLG	0.748	0.823	1.082	0.716	0.999	1.406	0.749	0.947	0.729	0.995	0.873
A1L4H1	Soluble scavenger receptor cysteine-rich domain-containing protein SSC5D	SSC5D	0.76891	1.349	2.17	1.445	1.205	0.889	0.741	0.641	0.668	0.61	1.214
O14786	Neuropilin-1	NRP1	0.838	1.08452	1.18192	0.963006	1.51248	1.18255	1.213	0.932	0.896	0.875	0.876
O95497	Pantetheinase	VNN1	1.02885	1.026	1.06	1.044	1.39169	0.925332	1.00752	1.00917	0.898	0.967	1.11
P01893	Putative HLA class I histocompatibility antigen, alpha chain H	HLA-H	0.684181	1.20589	1.16269	1.15487	1.13727	1.37608	0.989465	1.24676	1.01292	0.917618	1.13648
P02743	Serum amyloid P-component	APCS	1.662	1.03	1.051	1.07	0.973	0.839	1.011	1.006	0.939	0.987	1.05
P02768	Serum albumin	ALB	0.439	0.598	0.66	0.53	0.972	0.829	0.664	0.471	0.467	0.535	0.941
P02775	Platelet basic protein	PPBP	0.998	1.799	1.029	0.955	0.792	0.692	1.24928	1.11452	0.757487	0.835952	1.04875
P02788	Lactotransferrin	LTF	0.312	0.775	0.891	1.114	1.128	1.018	0.733	1.011	0.991	1.023	0.851
P03950	Angiogenin	ANG	1.59999	0.949041	0.904168	1.117	0.895661	0.996218	0.987	1.128	1.159	1.038	1.101
P04196	Histidine-rich glycoprotein	HRG	1.011	1.088	0.9	1.216	1.209	0.931	0.873	0.97	0.965	1.164	1.032
P04279	Semenogelin-1	SEMG1	0.539	0.799982	1.22685	0.818493	0.964	0.858	1.08057	1.00921	0.525	0.732	0.69
P04406	Glyceraldehyde-3-phphate dehydrogenase	GAPDH	0.306	1.538	1.037	0.769	0.869	0.713	1.441	1.031	0.683	0.599	0.518
P04839	Cytochrome b-245 heavy chain	CYBB	0.517204	1.005	1.328	1.108	0.904	1.19	1.154	1.08	1.197	0.729	0.836
P05067	Amyloid-beta precursor protein	APP	0.895	0.893	1.001	1.308	1.124	0.615	1.42869	2.50003	1.443	1.00173	0.956948
P05164	Myeloperoxidase	MPO	0.272	0.779	0.934	1.202	1.135	1.067	0.723	1.117	1.027	0.94	0.916
P05204	Non-histone chromomal protein HMG-17	HMGN2	0.308	0.57	0.987	1.277	1.183	0.892	0.78	1.297	0.788	0.707	1.22
P06899	Histone H2B type 1-J	HIST1H2BJ	0.123	0.557	1.085	1.362	1.777	0.905	0.584	1.293	1.173	0.759	0.81
P07451	Carbonic anhydrase 3	CA3	0.187	2.45	0.831	0.644	0.529	0.423	2.388	1.09	0.58	0.482	0.441
P09543	2',3'-cyclic-nucleotide 3'-phphodiesterase	CNP	0.348	0.930981	0.970899	0.859718	0.718632	1.12045	1.11004	0.992696	0.984881	0.893711	0.922497
P12830	Cadherin-1	CDH1	0.581	0.897807	1.0612	0.942629	0.952012	0.857632	1.028	0.984	1.01	0.909	1.049
P17213	Bactericidal permeability-increasing protein	BPI	0.397014	1.11	1.286	1.133	0.847	0.764	1.014	1.223	0.748	0.755	0.751
P17931	Galectin-3	LGALS3	1.00927	1.157	0.906	1.137			0.788	0.834
P18428	Lipopolysaccharide-binding protein	LBP	0.707	1.196	1.187	0.999	0.789	0.684	1.029	1.074	0.985	0.917	0.771
P20160	Azurocidin	AZU1	0.358	1.101	1.147	0.915	1.24994	1.07017	0.82	0.835	0.837785	1.03032	1.04868
P23246	Splicing factor, proline- and glutamine-rich	SFPQ	0.358809	1.09167	1.19576	1.02488	0.989	0.862	0.988	1.273	0.984219	0.913934	0.917774
P23284	Peptidyl-prolyl cis-trans isomerase B	PPIB	0.218	1.054	0.998	1.076	0.896	0.883	1.03289	1.09502	0.915469	0.739903	0.89546
P23528	Cofilin-1	CFL1	0.197	1.127	1.173	1.099	0.926	0.819	1.163	1.337	0.899	0.851	0.893
P26022	Pentraxin-related protein PTX3	PTX3	0.577708	0.908	1.016	1.55	1.082	0.942	0.779	1.251	1.418	1.064	0.903
P34096	Ribonuclease 4	RNASE4	0.845	0.889	1.008	1.194	1.2	0.943	1.184	1.061	0.874	0.836	0.756
P49913	Cathelicidin antimicrobial peptide	CAMP	0.309	1.169	1.323	1.153	0.972	0.945	1.016	1.121	1.136	0.875	0.979
P59665	Neutrophil defensin 1	DEFA1B	0.278	0.896	1.181	0.791	0.981	0.963	0.813363	1.05306	0.768445	0.641775	1.23176
P61626	Lysozyme C	LYZ	0.597	0.769	1.203	1.082	1.117	0.973	0.791	1.085	0.748	0.771	0.936
P61769	Beta-2-microglobulin	B2M	0.499	0.733861	0.726498	0.831624	0.944	0.761	0.945	0.652	0.603074	0.695496	0.768999
P81605	Dermcidin	DCD	0.806	1.028	0.715	0.699	1.005	0.959	0.779	0.922	0.672	0.865	0.949
Q02383	Semenogelin-2	SEMG2	0.448	0.677314	1.23299	0.69015	0.879	0.964	0.658495	1.27719	0.791	0.682	0.914
Q13867	Bleomycin hydrolase	BLMH	1.23475	1.022	1	0.918	0.837	1.376	0.954	0.924	0.867	0.954	0.966
Q14019	Coactin-like protein	COTL1	0.166	1.036	1.112	1.123	1.095	0.867	1.047	1.121	1.189	0.926	1.017
Q16539	Mitogen-activated protein kinase 14	MAPK14	0.286683	1.18	1.169	1.028	0.675757	0.667491	1.503	1.439	0.928095	0.775814	0.949458
Q8TAX7	Mucin-7	MUC7	0.384	0.736	1.088	0.772	0.724	0.765	1.096	0.709	0.721	0.438	0.58
Q92820	Gamma-glutamyl hydrolase	GGH	0.799	0.900423	1.13685	1.04249	1.114	1.007	0.917776	0.994485	0.994	0.902	1.095
Q96PD5	N-acetylmuramoyl-L-alanine amidase	PGLYRP2	1.118	0.99	0.921	1.049	1.056	0.896	0.985	0.951	1.044	0.923	0.912
Q96QA5	Gasdermin-A	GSDMA	1.035	0.981361	0.925001	0.815372	0.772907	1.31742	0.996157	1.04555	0.948768	0.801405	0.973539
Q99969	Retinoic acid receptor responder protein 2	RARRES2	1.48	1.20348	1.09729	1.03383	0.789	0.806	1.272	1.04	0.874499	0.747442	0.702951
Q9BS26	Endoplasmic reticulum resident protein 44	ERP44	0.481	0.94504	1.15849	1.1841	1.21	1.08	0.941	1.046	1.26519	1.03407	1.02793
Q9ULZ3	Apoptis-associated speck-like protein containing a CARD	PYCARD	0.184	1.22112	1.28624	1.21576	0.996	0.929	0.939974	1.34217	1.072	0.887	0.932
P68036	Ubiquitin-conjugating enzyme E2 L3	UBE2L3	0	1.15249	1.14987	1.01414	0.823	0.871	1.20267	1.24238	0.861	0.76	0.861
Q1KMD3	Heterogeneous nuclear ribonucleoprotein U-like protein 2	HNRNPUL2	0	0.757	0.868	1.032	0.669	1.328	1.236	1.141	0.845	0.804	0.838
P30040	Endoplasmic reticulum resident protein 29	ERP29	0	0.786	1.083	1.108	0.891392	1.0833	0.942462	0.935027	1.187	0.867	0.878
P07910	Heterogeneous nuclear ribonucleoproteins C1/C2	HNRNPC	0	1.11	1.304	1.099	0.954	0.897	1.208	1.452	1.124	1.075	1.212
P49458	Signal recognition particle 9 kDa protein	SRP9	0	1.10085	1.12645	1.03948	1.01729	0.964145	1.11082	1.27584	1.13359	0.887447	0.966143
Q96AE4	Far upstream element-binding protein 1	FUBP1	0	0.991155	0.925866	0.957699	0.728246	0.738069	0.876	1.106	1.162	1.1	0.924
O43196	MutS protein homolog 5	MSH5	0	1.717	0.551	0.457	0.285	0.311	1.513	0.851	0.704	0.713	0.601
P61204	ADP-ribylation factor 3	ARF3	0	1.169	1.21	0.833	0.879154	0.747078	1.41	1.246	1.05776	0.866972	0.90398
Q09028	Histone-binding protein RBBP4	RBBP4	0	0.926881	1.18757	1.13519	1.11122	1.17647	1.45299	1.08347	1.01272	1.01593	0.911038
Q99729	Heterogeneous nuclear ribonucleoprotein A/B	HNRNPAB	0	1.09397	1.19755	1.06012	0.9159	0.901732	0.906945	1.0684	1.02009	0.79414	0.821939
P09651	Heterogeneous nuclear ribonucleoprotein A1	HNRNPA1	0	1.05172	1.12329	1.0697	1.02	0.971	1.155	1.228	0.909327	0.820748	0.918694
P42766	60S ribomal protein L35	RPL35	0	8.616	4.23	0.835			5.896	0.738
O75594	Peptidoglycan recognition protein 1	PGLYRP1	0	1.882	1.244	1.297	1.82895	0.9998	1.118	1.12	1.00126	1.00266	0.807382
P55884	Eukaryotic translation initiation factor 3 subunit B	EIF3B	0	1.341	1.364	1.131	1.68596	1.09743			0.526	0.6	0.642
