# Supplementary material for: Surface Topography, Microbial Adhesion, and Immune Responses in Silicone Mammary Implant-Associated Capsular Fibrosis
Source: Preprints.org preprint supplement (doi:10.20944/preprints202401.2166.v1), 2024-01-31
Supplement: Supplementary file 2 [file Table S2 AMPs adhered to SMI surface.xlsx]

## Sheet: SMI adhered AMPs
			SMI_ 4 µm							SMI_ 60 µm
Accession	Description	GN	PAT 001	PAT 002	PAT 003	PAT 004	PAT 005	PAT 006	PAT 007	PAT 001	PAT 002	PAT 003	PAT 004	PAT 005	PAT 006	PAT 007
P09382	Galectin-1	LGALS1	8.97333e+08	8.58667e+07	5.78333e+07	3.25667e+07	554400000	6.90667e+07	5.14333e+07	100700000	1.21767e+07	9.96333e+08	432400000	2.34367e+08	300900000	2.39367e+08
P23528	Cofilin-1	CFL1	343000000	3.76333e+07	9.53667e+07	5.41667e+07	378000000	56700000	75900000	1.15633e+08	5.31333e+07	871000000	1.63533e+08	8.12333e+07	182600000	7.81667e+07
P47929	Galectin-7	LGALS7B	138400000	1.78333e+07	4.04667e+07	38000000	12450000	7.58667e+06	2.55667e+06	203000000	462463500	241000000	1.05333e+08	1.12967e+08	9745000	4510000
P17931	Galectin-3	LGALS3	228000000	7760000	2.26333e+07	3.13867e+07	1.04633e+08	2.69667e+07	1.87533e+07	31400000	14845000	7.18667e+07	7.60333e+07	32000000	4.54667e+07	38120000
P20930	Filaggrin	FLG	1.88233e+07	4.41667e+06	2.62667e+06	932667	5.99517e+06	1.23667e+07	1.85667e+07	6820000	2.01767e+08	7.26633e+06	2.61318e+06	2404750	114440000	22800000
Q5D862	Filaggrin-2	FLG2	0	0	0	0	0	0	0	2.05667e+07	45200000	22768000	9660000	34630000	5.86097e+08	38500000
