# Supplementary material for: Surface Topography, Microbial Adhesion, and Immune Responses in Silicone Mammary Implant-Associated Capsular Fibrosis
Source: Preprints.org preprint supplement (doi:10.20944/preprints202401.2166.v1), 2024-01-31
Supplement: Supplementary file 3 [file Table S3 bacterial read count data.xlsx]

## Sheet: Metadata
Sample_ID	Patient_ID	Description	Specimen	Unblinded_Group
16S.001.011Z	P_001	Wound Bed Fluid 24 hr post-surgery Left	1.5 ml in DNA/RNA Shield	WBF1_D1_Silk
16S.001.013Z	P_001	Wound Bed Fluid 24 hr post-surgery Right	1.5 ml in DNA/RNA Shield	WBF1_D1_CPX
16S.001.018Z	P_001	Wound Bed Fluid 48 hr post-surgery Left	1.5 ml in DNA/RNA Shield	WBF1_D2_Silk
16S.001.020Z	P_001	Wound Bed Fluid 48 hr post-surgery Right	1.5 ml in DNA/RNA Shield	WBF1_D2_CPX
16S.001.025Z	P_001	Wound Bed Fluid Day 3 post-surgery Left	1.5 ml in DNA/RNA Shield	WBF1_D3_Silk
16S.001.027Z	P_001	Wound Bed Fluid Day 3 post-surgery Right	1.5 ml in DNA/RNA Shield	WBF1_D3_CPX
16S.001.032Z	P_001	Wound Bed Fluid Day 4 post-surgery Left	1.5 ml in DNA/RNA Shield	WBF1_D4_Silk
16S.001.034Z	P_001	Wound Bed Fluid Day 4 post-surgery Right	1.5 ml in DNA/RNA Shield	WBF1_D4_CPX
16S.001.040Z	P_001	Wound Bed Fluid Day 5 post-surgery Left	1.5 ml in DNA/RNA Shield	WBF1_D5_Silk
16S.001.042Z	P_001	Wound Bed Fluid Day 5 post-surgery Right	1.5 ml in DNA/RNA Shield	WBF1_D5_CPX
16S.001.047	P_001	Expander Swab Left	DNA/RNA Shield swab (1 ml)	ExpSw_Silk
16S.001.048	P_001	Expander Swab Right	DNA/RNA Shield swab (1 ml)	ExpSw_CPX
16S.001.070	P_001	Wound Bed Fluid Left	1.5 ml in DNA/RNA Shield	WBF2_D1_Silk
16S.001.075	P_001	Wound Bed Fluid Right	1.5 ml in DNA/RNA Shield	WBF2_D1_CPX
16S.001.058.2	P_001	Capsular Tissue Left Front - Contact Titan Bra (Host Zero protocol)	Prepared using bead beating + Host Zero protocol (bead beating did not break up tissue very well)	Caps_Bra_Silk_HZ
16S.001.065.2	P_001	Capsular Tissue Right - Contact Titan Bra (Host Zero protocol)	Prepared using bead beating + Host Zero protocol (bead beating did not break up tissue very well)	Caps_Bra_CPX_HZ
16S.001.080.2	P_001	Capsular Tissue Left Front - Back contact M pectoralis (Host Zero protocol)	Prepared using bead beating + Host Zero protocol (bead beating did not break up tissue very well)	Caps_Pec_Silk_HZ
16S.001.087.2	P_001	Capsular Tissue Right - Back contact M pectoralis (Host Zero protocol)	Prepared using bead beating + Host Zero protocol (bead beating did not break up tissue very well)	Caps_Pec_CPX_HZ
16S.002.008	P_002	Wound Bed Fluid 24 h post surgery Left (1.5 ml)	1.5 ml in DNA/RNA Shield	WBF1_D1_Silk
16S.002.010	P_002	Wound Bed Fluid 24 h post surgery Right (1.5 ml)	1.5 ml in DNA/RNA Shield	WBF1_D1_CPX
16S.002.012	P_002	Wound Bed Fluid 48 h post surgery Left (1.5 ml)	1.5 ml in DNA/RNA Shield	WBF1_D2_Silk
16S.002.014	P_002	Wound Bed Fluid 48 h post surgery Right (1.5 ml)	1.5 ml in DNA/RNA Shield	WBF1_D2_CPX
16S.002.016	P_002	Wound Bed Fluid 3D post surgery Left (1.5 ml)	1.5 ml in DNA/RNA Shield	WBF1_D3_Silk
16S.002.018	P_002	Wound Bed Fluid 3 h post surgery Right (1.5 ml)	1.5 ml in DNA/RNA Shield	WBF1_D3_CPX
16S.002.020.Z	P_002	Wound Bed Fluid 4D post surgery Left (1.5 ml)	1.5 ml in DNA/RNA Shield	WBF1_D4_Silk
16S.002.022.Z	P_002	Wound Bed Fluid 4D post surgery Right (1.5 ml)	1.5 ml in DNA/RNA Shield	WBF1_D4_CPX
16S.002.024.Z	P_002	Wound Bed Fluid 5D post surgery Left (1.5 ml)	1.5 ml in DNA/RNA Shield	WBF1_D5_Silk
16S.002.026.Z	P_002	Wound Bed Fluid 5D post surgery Right (1.5 ml)	1.5 ml in DNA/RNA Shield	WBF1_D5_CPX
16S.002.032	P_002	Expander Swab Left	DNA/RNA Shield swab (1 ml)	ExpSw_Silk
16S.002.033	P_002	Expander Swab Right	DNA/RNA Shield swab (1 ml)	ExpSw_CPX
16S.002.067	P_002	Wound Bed Fluid 1d Post-op Left	1.5 ml in DNA/RNA Shield	WBF2_D1_Silk
16S.002.072	P_002	Wound Bed Fluid 1d Post-op Right	1.5 ml in DNA/RNA Shield	WBF2_D1_CPX
16S.002.041.2	P_002	Capsular Tissue Left Front - Contact Titan Bra (Host Zero protocol)	Prepared using bead beating + Host Zero protocol (bead beating did not break up tissue very well)	Caps_Bra_Silk_HZ
16S.002.047.2	P_002	Capsular Tissue Right - Contact Titan Bra (Host Zero protocol)	Prepared using bead beating + Host Zero protocol (bead beating did not break up tissue very well)	Caps_Bra_CPX_HZ
16S.002.053.2	P_002	Capsular Tissue Left Front - Back contact M pectoralis (Host Zero protocol)	Prepared using bead beating + Host Zero protocol (bead beating did not break up tissue very well)	Caps_Pec_Silk_HZ
16S.002.059.2	P_002	Capsular Tissue Right - Back contact M pectoralis (Host Zero protocol)	Prepared using bead beating + Host Zero protocol (bead beating did not break up tissue very well)	Caps_Pec_CPX_HZ
16S.3.008.Z	P_003	WBF 24 h post surgery Left (1.5 ml)	1.5 ml in DNA/RNA Shield	WBF1_D1_CPX
16S.3.010.Z	P_003	WBF 24 h post surgery Right (1.5 ml)	1.5 ml in DNA/RNA Shield	WBF1_D1_Silk
16S.3.012.Z	P_003	WBF 48 h post surgery Left (1.5 ml)	1.5 ml in DNA/RNA Shield	WBF1_D2_CPX
16S.3.014.Z	P_003	WBF 48 h post surgery Right (1.5 ml)	1.5 ml in DNA/RNA Shield	WBF1_D2_Silk
16S.3.016.Z	P_003	WBF 3D post surgery Left (1.5 ml)	1.5 ml in DNA/RNA Shield	WBF1_D3_CPX
16S.3.018.Z	P_003	WBF 3D post surgery Right (1.5 ml)	1.5 ml in DNA/RNA Shield	WBF1_D3_Silk
16S.3.020.Z	P_003	WBF 4D post surgery Left (1.5 ml)	1.5 ml in DNA/RNA Shield	WBF1_D4_CPX
16S.3.022.Z	P_003	WBF 4D post surgery Right (1.5 ml)	1.5 ml in DNA/RNA Shield	WBF1_D4_Silk
16S.3.024.Z	P_003	WBF D post surgery Left (1.5 ml)	1.5 ml in DNA/RNA Shield	WBF1_D5_CPX
16S.3.026.Z	P_003	WBF 5D post surgery Right (1.5 ml)	1.5 ml in DNA/RNA Shield	WBF1_D5_Silk
16S.3.032	P_003	Expander swab L	DNA/RNA Shield swab (1 ml)	ExpSw_CPX
16S.3.033	P_003	Expander swab_R	DNA/RNA Shield swab (1 ml)	ExpSw_Silk
16S.3.041.2.HZ	P_003	Capsular Tissue Left Front - Contact Titan Bra (Host Zero protocol)	Prepared using grinding/bead beating + Host Zero protocol	Caps_Bra_CPX_HZ
16S.3.047.2.HZ	P_003	Capsular Tissue Right - Contact Titan Bra (Host Zero protocol)	Prepared using grinding/bead beating + Host Zero protocol	Caps_Bra_Silk_HZ
16S.4.008.Z	P_004	WBF 24 h post surgery Left (1.5 ml)	1.5 ml in DNA/RNA Shield	WBF1_D1_CPX
16S.4.010.Z	P_004	WBF 24 h post surgery Right (1.5 ml)	1.5 ml in DNA/RNA Shield	WBF1_D1_Silk
16S.4.012.Z	P_004	WBF 48 h post surgery Left (1.5 ml)	1.5 ml in DNA/RNA Shield	WBF1_D2_CPX
16S.4.014.Z	P_004	WBF 48 h post surgery Right (1.5 ml)	1.5 ml in DNA/RNA Shield	WBF1_D2_Silk
16S.4.016.Z	P_004	WBF 3D post surgery Left (1.5 ml)	1.5 ml in DNA/RNA Shield	WBF1_D3_CPX
16S.4.018.Z	P_004	WBF 3D post surgery Right (1.5 ml)	1.5 ml in DNA/RNA Shield	WBF1_D3_Silk
16S.4.020.Z	P_004	WBF 4D post surgery Left (1.5 ml)	1.5 ml in DNA/RNA Shield	WBF1_D4_CPX
16S.4.022.Z	P_004	WBF 4D post surgery Right (1.5 ml)	1.5 ml in DNA/RNA Shield	WBF1_D4_Silk
16S.4.024.Z	P_004	WBF D post surgery Left (1.5 ml)	1.5 ml in DNA/RNA Shield	WBF1_D5_CPX
16S.4.026.Z	P_004	WBF 5D post surgery Right (1.5 ml)	1.5 ml in DNA/RNA Shield	WBF1_D5_Silk
16S.4.032	P_004	Expander swab L	DNA/RNA Shield swab (1 ml)	ExpSw_CPX
16S.4.033	P_004	Expander Swab R	DNA/RNA Shield swab (1 ml)	ExpSw_Silk
16S.4.041.2.HZ	P_004	Capsular Tissue Left Front - Contact Titan Bra (Host Zero protocol)	Prepared using grinding/bead beating + Host Zero protocol	Caps_Bra_CPX_HZ
16S.4.047.2.HZ	P_004	Capsular Tissue Right - Contact Titan Bra (Host Zero protocol)	Prepared using grinding/bead beating + Host Zero protocol	Caps_Bra_Silk_HZ
16S.4.053.2.HZ	P_004	Capsular Tissue Left Front - Back contact M pectoralis (Host Zero protocol)	Prepared using grinding/bead beating + Host Zero protocol	Caps_Pec_CPX_HZ
16S.4.059.2.HZ	P_004	Capsular Tissue Right - Back contact M pectoralis (Host Zero protocol)	Prepared using grinding/bead beating + Host Zero protocol	Caps_Pec_Silk_HZ
16S.5.008.Z	P_005	WBF 24 h post surgery Left (1.5 ml)	1.5 ml in DNA/RNA Shield	WBF1_D1_Silk
16S.5.010.Z	P_005	WBF 24 h post surgery Right (1.5 ml)	1.5 ml in DNA/RNA Shield	WBF1_D1_CPX
16S.5.012.Z	P_005	WBF 48 h post surgery Left (1.5 ml)	1.5 ml in DNA/RNA Shield	WBF1_D2_Silk
16S.5.014.Z	P_005	WBF 48 h post surgery Right (1.5 ml)	1.5 ml in DNA/RNA Shield	WBF1_D2_CPX
16S.5.016.Z	P_005	WBF 3D post surgery Left (1.5 ml)	1.5 ml in DNA/RNA Shield	WBF1_D3_Silk
16S.5.018.Z	P_005	WBF 3D post surgery Right (1.5 ml)	1.5 ml in DNA/RNA Shield	WBF1_D3_CPX
16S.5.020.V2	P_005	WBF 4D post surgery Left (1.5 ml)	1.5 ml in DNA/RNA Shield	WBF1_D4_Silk
16S.5.022.V2	P_005	WBF 4D post surgery Right (1.5 ml)	1.5 ml in DNA/RNA Shield	WBF1_D4_CPX
16S.5.024.V2	P_005	WBF D post surgery Left (1.5 ml)	1.5 ml in DNA/RNA Shield	WBF1_D5_Silk
16S.5.026.V2	P_005	WBF 5D post surgery Right (1.5 ml)	1.5 ml in DNA/RNA Shield	WBF1_D5_CPX
16S.5.032	P_005	Expander swab L	DNA/RNA Shield swab (1 ml)	ExpSw_Silk
16S.5.033	P_005	Expander swab_R	DNA/RNA Shield swab (1 ml)	ExpSw_CPX
16S.5.041.2.HZ	P_005	Capsular Tissue Left Front - Contact Titan Bra (Host Zero protocol)	Prepared using bead grinding/beating + Host Zero protocol	Caps_Bra_Silk_HZ
16S.5.047.2.HZ	P_005	Capsular Tissue Right - Contact Titan Bra (Host Zero protocol)	Prepared using bead grinding/beating + Host Zero protocol	Caps_Bra_CPX_HZ
16S.6.008	P_006	WBF 24 hr post-surgery Left	1.5 ml in DNA/RNA Shield	WBF1_D1_CPX
16S.6.010	P_006	WBF 24 hr post-surgery Right	1.5 ml in DNA/RNA Shield	WBF1_D1_Silk
16S.6.012	P_006	WBF 48 hr post-surgery Left	1.5 ml in DNA/RNA Shield	WBF1_D2_CPX
16S.6.014	P_006	WBF 48 hr post-surgery Right	1.5 ml in DNA/RNA Shield	WBF1_D2_Silk
16S.6.016	P_006	WBF Day 3 post-surgery Left	1.5 ml in DNA/RNA Shield	WBF1_D3_CPX
16S.6.018	P_006	WBF Day 3 post-surgery Right	1.5 ml in DNA/RNA Shield	WBF1_D3_Silk
16S.6.020	P_006	WBF Day 4 post-surgery Left	1.5 ml in DNA/RNA Shield	WBF1_D4_CPX
16S.6.022	P_006	WBF Day 4 post-surgery Right	1.5 ml in DNA/RNA Shield	WBF1_D4_Silk
16S.6.024	P_006	WBF Day 5 post-surgery Left	1.5 ml in DNA/RNA Shield	WBF1_D5_CPX
16S.6.026	P_006	WBF Day 5 post-surgery Right	1.5 ml in DNA/RNA Shield	WBF1_D5_Silk
16S.6.032	P_006	Expander Swab Left	DNA/RNA Shield swab (1 ml)	ExpSw_CPX
16S.6.033	P_006	Expander Swab Right	1.5 ml in DNA/RNA Shield	ExpSw_Silk
16S.6.041.2.HZ	P_006	Capsular Tissue Left Front - Contact Titan Bra (Host Zero protocol)	Prepared using grinding/bead beating + Host Zero protocol	Caps_Bra_CPX_HZ
16S.6.047.2.HZ	P_006	Capsular Tissue Right - Contact Titan Bra (Host Zero protocol)	Prepared using grinding/bead beating + Host Zero protocol	Caps_Bra_Silk_HZ
16S.6.053.2.HZ	P_006	Capsular Tissue Left Front - Back contact M pectoralis (Host Zero protocol)	Prepared using grinding/bead beating + Host Zero protocol	Caps_Pec_CPX_HZ
16S.6.059.2.HZ	P_006	Capsular Tissue Right - Back contact M pectoralis (Host Zero protocol)	Prepared using grinding/bead beating + Host Zero protocol	Caps_Pec_Silk_HZ
16S.7.008	P_007	WBF 24 hr post-surgery Left	1.5 ml in DNA/RNA Shield	WBF1_D1_CPX
16S.7.010	P_007	WBF 24 hr post-surgery Right	1.5 ml in DNA/RNA Shield	WBF1_D1_Silk
16S.7.012	P_007	WBF 48 hr post-surgery Left	1.5 ml in DNA/RNA Shield	WBF1_D2_CPX
16S.7.014	P_007	WBF 48 hr post-surgery Right	1.5 ml in DNA/RNA Shield	WBF1_D2_Silk
16S.7.016	P_007	WBF Day 3 post-surgery Left	1.5 ml in DNA/RNA Shield	WBF1_D3_CPX
16S.7.018	P_007	WBF Day 3 post-surgery Right	1.5 ml in DNA/RNA Shield	WBF1_D3_Silk
16S.7.020	P_007	WBF Day 4 post-surgery Left	1.5 ml in DNA/RNA Shield	WBF1_D4_CPX
16S.7.022	P_007	WBF Day 4 post-surgery Right	1.5 ml in DNA/RNA Shield	WBF1_D4_Silk
16S.7.024	P_007	WBF Day 5 post-surgery Left	1.5 ml in DNA/RNA Shield	WBF1_D5_CPX
16S.7.026	P_007	WBF Day 5 post-surgery Right	1.5 ml in DNA/RNA Shield	WBF1_D5_Silk
16S.7.032	P_007	Expander Swab Left	DNA/RNA Shield swab (1 ml)	ExpSw_CPX
16S.7.033	P_007	Expander Swab Right	1.5 ml in DNA/RNA Shield	ExpSw_Silk
16S.7.041.2.HZ	P_007	Capsular Tissue Left Front - Contact Titan Bra (Host Zero protocol)	Prepared using grinding/bead beating + Host Zero protocol	Caps_Bra_CPX_HZ
16S.7.053.2.HZ	P_007	Capsular Tissue Left Front - Back contact M pectoralis (Host Zero protocol)	Prepared using grinding/bead beating + Host Zero protocol	Caps_Pec_CPX_HZ

## Sheet: Read_counts
Sample_ID	k__Bacteria;p__Firmicutes;c__Bacilli;o__Lactobacillales;f__Aerococcaceae;g__Aerococcus;s__urinaeequi-viridans	k__Bacteria;p__Proteobacteria;c__Deltaproteobacteria;o__Desulfuromonadales;f__Geobacteraceae;g__NA;s__NA	k__Bacteria;p__Firmicutes;c__Bacilli;o__Bacillales;f__Paenibacillaceae;g__Paenibacillus;s__amylolyticus-xylanexedens	k__Bacteria;p__Firmicutes;c__Bacilli;o__Bacillales;f__Paenibacillaceae;g__Paenibacillus;s__amylolyticus	k__Bacteria;p__Firmicutes;c__Bacilli;o__Bacillales;f__Paenibacillaceae;g__Paenibacillus;s__taichungensis-xylanexedens	k__Bacteria;p__Firmicutes;c__Bacilli;o__Bacillales;f__Paenibacillaceae;g__Paenibacillus;s__pabuli-xylanexedens	k__Bacteria;p__Firmicutes;c__Bacilli;o__Bacillales;f__Paenibacillaceae;g__Paenibacillus;s__oceanisediminis	k__Bacteria;p__Firmicutes;c__Bacilli;o__Bacillales;f__Paenibacillaceae;g__Paenibacillus;s__xylanexedens	k__Bacteria;p__Firmicutes;c__Bacilli;o__Bacillales;f__Paenibacillaceae;g__Paenibacillus;s__lautus	k__Bacteria;p__Firmicutes;c__Bacilli;o__Bacillales;f__Paenibacillaceae;g__Paenibacillus;s__pini	k__Bacteria;p__Firmicutes;c__Bacilli;o__Bacillales;f__Paenibacillaceae;g__Paenibacillus;s__provencensis	k__Bacteria;p__Firmicutes;c__Bacilli;o__Bacillales;f__NA;g__NA;s__NA	k__Bacteria;p__Firmicutes;c__Bacilli;o__Bacillales;f__Paenibacillaceae;g__NA;s__NA	k__Bacteria;p__Firmicutes;c__Bacilli;o__Bacillales;f__Paenibacillaceae;g__Paenibacillus;s__NA	k__Bacteria;p__Firmicutes;c__Bacilli;o__Bacillales;f__Bacillaceae;g__Bacillus;s__sp25908	k__Bacteria;p__Firmicutes;c__Bacilli;o__Bacillales;f__Bacillaceae;g__Lysinibacillus;s__NA	k__Bacteria;p__Firmicutes;c__Bacilli;o__Bacillales;f__Bacillaceae;g__NA;s__NA	k__Bacteria;p__Firmicutes;c__Bacilli;o__Bacillales;f__Listeriaceae;g__Brochothrix;s__thermosphacta	k__Bacteria;p__Firmicutes;c__Bacilli;o__Bacillales;f__Listeriaceae;g__Listeria;s__monocytogenes	k__Bacteria;p__Firmicutes;c__Bacilli;o__Bacillales;f__Planococcaceae;g__NA;s__NA	k__Bacteria;p__Firmicutes;c__Bacilli;o__Bacillales;f__Planococcaceae;g__Planococcus;s__NA	k__Bacteria;p__Firmicutes;c__Bacilli;o__Bacillales;f__Planococcaceae;g__Planococcus;s__plakortidis	k__Bacteria;p__Firmicutes;c__Bacilli;o__Bacillales;f__Planococcaceae;g__Planomicrobium;s__okeanokoites	k__Bacteria;p__Firmicutes;c__Bacilli;o__Bacillales;f__Planococcaceae;g__Planococcus;s__psychrotoleratus	k__Bacteria;p__Firmicutes;c__Bacilli;o__Bacillales;f__Planococcaceae;g__Planococcus-Planomicrobium;s__NA	k__Bacteria;p__Chlorobi;c__Chlorobia;o__Chlorobiales;f__NA;g__NA;s__NA	k__Bacteria;p__Firmicutes;c__Bacilli;o__Bacillales;f__Bacillales Family XII. Incertae Sedis;g__Exiguobacterium;s__marinum	k__Bacteria;p__Firmicutes;c__Bacilli;o__Bacillales;f__Bacillales Family XII. Incertae Sedis;g__Exiguobacterium;s__mexicanum	k__Bacteria;p__Firmicutes;c__Bacilli;o__Bacillales;f__Bacillales Family XII. Incertae Sedis;g__Exiguobacterium;s__aurantiacum	k__Bacteria;p__Firmicutes;c__Bacilli;o__Bacillales;f__Sporolactobacillaceae;g__Pullulanibacillus;s__camelliae	k__Bacteria;p__Firmicutes;c__Bacilli;o__Bacillales;f__Bacillaceae;g__Anoxybacillus;s__pushchinoensis	k__Bacteria;p__Firmicutes;c__Bacilli;o__Bacillales;f__Bacillaceae;g__Anoxybacillus-Bacillus;s__flavithermus-thermocopriae	k__Bacteria;p__Firmicutes;c__Bacilli;o__Bacillales;f__Sporolactobacillaceae;g__Sinobaca;s__beijingensis	k__Bacteria;p__Firmicutes;c__Bacilli;o__Bacillales;f__Bacillaceae;g__Geobacillus;s__lituanicus-stearothermophilus	k__Bacteria;p__Firmicutes;c__Bacilli;o__Bacillales;f__Bacillaceae;g__Geobacillus;s__NA	k__Bacteria;p__Firmicutes;c__Bacilli;o__Bacillales;f__Bacillaceae;g__Geobacillus;s__stearothermophilus	k__Bacteria;p__Firmicutes;c__Bacilli;o__Bacillales;f__Bacillaceae;g__Bacillus;s__amyloliquefaciens-subtilis	k__Bacteria;p__Firmicutes;c__Bacilli;o__Bacillales;f__Bacillaceae;g__Bacillus;s__NA	k__Bacteria;p__Firmicutes;c__Bacilli;o__Bacillales;f__Bacillaceae;g__Bacillus;s__niabensis	k__Bacteria;p__Firmicutes;c__Bacilli;o__Bacillales;f__Bacillaceae;g__Bacillus;s__galliciensis	k__Bacteria;p__Firmicutes;c__Bacilli;o__Bacillales;f__Bacillaceae;g__Bacillus;s__cereus-thuringiensis	k__Bacteria;p__Firmicutes;c__Bacilli;o__Bacillales;f__Staphylococcaceae;g__Macrococcus;s__canis-caseolyticus	k__Bacteria;p__Firmicutes;c__Bacilli;o__Bacillales;f__Staphylococcaceae;g__Staphylococcus;s__sciuri	k__Bacteria;p__Firmicutes;c__Bacilli;o__Bacillales;f__Staphylococcaceae;g__Staphylococcus;s__epidermidis	k__Bacteria;p__Firmicutes;c__Bacilli;o__Bacillales;f__Staphylococcaceae;g__Staphylococcus;s__capitis	k__Bacteria;p__Firmicutes;c__Bacilli;o__Bacillales;f__Staphylococcaceae;g__Staphylococcus;s__capitis-caprae	k__Bacteria;p__Firmicutes;c__Bacilli;o__Bacillales;f__Staphylococcaceae;g__Staphylococcus;s__pasteuri	k__Bacteria;p__Firmicutes;c__Bacilli;o__Bacillales;f__Staphylococcaceae;g__Staphylococcus;s__pasteuri-warneri	k__Bacteria;p__Firmicutes;c__Bacilli;o__Bacillales;f__Staphylococcaceae;g__Staphylococcus;s__lugdunensis
16S.001.047	0	0	0	0	0	0	0	0	0	0	0	0	0	0	0	0	0	0	0	0	0	0	0	0	0	0	0	0	0	0	0	0	0	0	0	0	0	0	0	0	0	0	0	63	0	22	0	0	0
16S.002.032	0	0	0	0	0	0	0	0	0	0	0	0	0	0	0	0	0	0	0	0	0	0	0	0	0	0	0	0	0	0	0	0	0	0	0	0	0	0	0	0	0	0	0	142	0	0	0	0	0
16S.3.033	0	0	0	0	0	0	0	0	0	0	0	0	0	0	0	0	0	0	0	0	0	0	0	0	0	0	0	0	0	0	0	0	128	0	0	0	0	0	0	0	0	0	0	478	0	0	0	0	0
16S.4.033	0	0	0	0	0	0	0	0	0	0	0	0	0	0	0	0	0	0	0	586	0	0	0	0	0	0	0	0	0	0	0	0	0	0	0	0	0	0	0	0	0	0	0	0	0	516	0	0	0
16S.5.032	246	0	0	0	0	0	0	0	0	0	0	783	0	0	0	0	0	0	0	0	0	0	0	0	0	0	0	0	0	0	0	0	0	0	0	71	0	0	0	0	0	0	0	0	0	0	0	0	0
16S.6.033	0	0	0	0	0	0	0	0	0	0	0	0	0	0	0	0	0	0	0	0	0	0	0	0	0	0	0	0	0	0	0	0	0	0	0	0	1019	0	0	0	0	0	0	0	0	873	0	0	0
16S.7.033	132	0	0	0	0	0	0	0	0	0	0	0	0	0	0	0	0	0	0	0	0	0	0	0	0	0	0	0	0	0	0	0	0	0	0	0	0	0	0	0	0	0	0	0	676	1544	0	0	0
16S.001.048	0	0	0	0	0	0	0	0	0	0	0	0	0	0	0	0	0	0	0	0	0	0	0	0	0	0	0	0	0	0	0	0	0	0	0	0	0	0	0	0	0	0	0	0	0	0	0	0	0
16S.002.033	0	0	0	0	0	0	0	0	0	0	0	0	0	0	0	0	0	0	0	0	0	0	0	0	0	0	0	0	0	0	0	0	0	0	0	0	0	0	0	0	0	0	0	122	0	0	0	0	0
16S.3.032	0	0	0	0	0	0	0	0	0	0	0	0	0	0	0	0	0	0	0	0	0	0	0	0	0	0	0	0	0	0	0	0	0	0	0	0	0	0	0	0	0	0	0	306	0	0	0	0	0
16S.4.032	0	0	0	0	0	0	0	0	0	0	0	49	0	0	0	0	0	0	0	0	0	0	0	0	0	0	0	0	0	0	0	0	0	0	0	0	0	0	0	0	0	0	0	106	0	0	0	0	0
16S.5.033	0	0	0	0	0	0	0	0	0	0	0	0	0	0	0	0	0	0	0	0	0	0	0	0	0	0	0	0	0	0	0	0	0	0	0	0	0	0	0	0	0	0	0	1461	0	0	0	0	0
16S.6.032	0	0	0	0	0	0	0	0	0	0	0	0	0	0	0	0	0	0	0	0	0	0	0	0	0	0	0	0	0	0	0	0	0	0	0	0	0	0	0	0	0	0	0	0	0	0	0	0	0
16S.7.032	0	0	0	0	0	0	0	0	0	0	0	0	0	0	0	0	0	0	0	0	0	0	0	0	0	0	0	0	0	0	0	0	0	0	0	0	0	0	0	0	0	0	0	116	0	0	0	0	0
16S.001.013Z	0	0	0	0	0	0	0	0	0	0	0	0	0	0	0	0	0	0	0	0	0	0	0	0	0	0	0	0	0	0	0	0	0	0	0	0	0	0	0	0	0	0	0	58	0	0	0	0	0
16S.001.020Z	0	0	0	0	0	0	0	0	0	0	0	0	0	0	0	0	0	0	0	0	0	0	0	0	0	0	0	0	0	0	0	0	0	0	0	0	0	0	0	0	0	0	0	0	0	0	0	0	0
16S.001.027Z	0	0	0	0	0	0	0	0	0	0	0	0	0	0	0	0	0	0	0	0	0	0	0	0	0	0	0	0	0	0	0	0	0	0	0	0	0	0	0	0	0	0	0	0	0	0	0	0	0
16S.001.034Z	0	0	0	0	0	0	0	0	0	0	0	0	0	0	0	0	0	0	0	0	0	0	0	0	0	0	0	0	0	0	0	0	0	0	0	0	0	0	0	0	0	0	0	0	0	0	0	0	0
16S.001.042Z	0	0	0	0	0	0	0	0	0	0	0	0	0	0	0	0	0	0	0	0	0	0	0	0	0	0	0	0	0	0	0	0	0	0	0	0	0	0	0	0	0	0	0	0	0	0	0	0	0
16S.001.075	0	0	0	0	0	0	0	0	0	0	0	0	0	0	0	0	0	0	0	0	0	0	0	0	0	0	0	0	0	0	0	0	0	0	0	0	0	0	0	0	0	0	0	30	0	27	0	0	0
16S.002.010	0	0	0	0	0	0	0	0	0	0	0	0	0	0	0	0	0	0	0	0	0	0	0	0	0	0	0	0	0	0	0	0	0	0	0	0	0	0	0	0	0	0	0	227	0	0	0	20	0
16S.002.014	0	0	0	0	0	0	0	0	0	0	0	0	0	0	0	0	0	12	0	0	0	0	0	0	0	0	0	0	0	0	0	0	0	0	0	0	0	0	0	0	0	0	0	12	0	0	0	0	0
16S.002.018	0	0	0	0	0	0	0	0	0	0	0	0	0	0	0	0	0	0	0	0	0	0	0	0	0	0	0	0	0	0	0	0	0	0	0	0	0	0	0	0	0	0	0	0	0	0	0	0	0
16S.002.022.Z	0	0	0	0	0	0	0	0	0	0	0	0	0	0	0	0	0	0	0	0	0	0	0	0	0	0	0	0	0	0	0	0	0	0	0	0	0	0	0	0	0	0	0	0	0	0	0	0	0
16S.002.026.Z	0	0	0	0	0	0	0	0	0	0	0	0	0	0	0	0	0	0	0	0	0	0	0	0	0	0	0	0	0	0	0	0	0	0	0	0	0	0	0	0	0	0	0	0	0	0	0	0	0
16S.002.072	0	0	0	0	0	0	0	0	0	0	0	0	0	0	0	0	0	0	0	0	0	0	0	0	0	0	0	0	0	0	0	0	0	0	0	0	0	0	0	0	0	0	0	118	0	0	0	0	0
16S.3.008.Z	0	0	0	0	0	0	0	0	0	0	0	0	0	0	0	0	0	0	0	0	0	0	0	0	0	0	0	0	0	0	0	0	0	0	0	0	0	0	0	0	0	0	0	22	0	0	0	0	0
16S.3.012.Z	0	0	0	0	0	0	0	0	0	0	0	0	0	0	0	0	0	0	0	0	0	0	0	0	0	0	0	0	0	0	0	0	0	0	0	0	0	0	0	0	0	0	0	0	0	26	0	24	0
16S.3.016.Z	0	0	0	0	0	0	0	0	0	0	0	0	0	0	0	0	0	0	0	0	0	0	0	0	0	0	0	0	0	0	0	0	0	0	0	0	0	0	0	0	0	0	0	0	0	0	0	0	0
16S.3.020.Z	0	0	0	0	0	0	0	0	0	0	0	0	0	0	0	0	0	0	0	0	0	0	0	0	0	0	0	0	0	0	0	0	0	0	0	0	0	0	0	0	0	39	0	0	0	0	0	0	0
16S.3.024.Z	0	0	132	50	56	0	40	0	0	0	15	0	0	0	0	0	0	0	0	0	0	0	0	0	0	0	0	0	0	0	0	0	0	0	0	0	0	0	0	0	0	0	0	0	0	0	0	15	0
16S.4.008.Z	0	0	0	0	0	0	0	0	0	0	0	0	0	0	0	0	0	0	0	0	0	0	0	0	0	0	0	0	0	0	0	0	0	0	0	0	0	0	0	0	0	0	0	629	0	0	0	0	0
16S.4.012.Z	0	0	0	0	0	0	0	0	0	0	0	0	0	0	0	0	0	0	0	0	0	0	0	0	0	0	0	0	0	0	0	0	0	0	0	0	0	0	0	0	0	0	0	77	0	0	0	0	0
16S.4.016.Z	0	0	0	0	0	0	0	0	0	0	0	0	0	0	0	0	0	0	0	0	0	0	0	0	0	0	0	0	0	0	0	0	0	0	0	0	0	0	0	0	0	0	0	14	0	0	0	0	0
16S.4.020.Z	0	0	0	0	0	0	0	0	0	0	0	0	0	0	0	0	0	0	0	0	0	0	0	0	0	0	0	0	0	0	0	0	0	0	0	0	0	0	0	0	0	0	0	0	0	0	0	0	0
16S.4.024.Z	0	0	0	0	0	0	0	0	0	0	0	0	0	0	0	0	0	0	0	0	0	0	0	0	0	0	0	0	0	0	0	0	0	0	0	0	0	0	0	0	0	0	0	15	0	0	0	15	0
16S.5.010.Z	0	0	0	0	0	0	0	0	0	0	0	0	0	0	0	0	0	0	0	0	0	0	0	0	0	0	0	0	0	0	0	0	0	0	0	0	0	0	251	0	0	0	0	381	0	0	0	0	0
16S.5.014.Z	0	0	0	0	0	0	0	0	0	0	0	0	0	0	0	0	0	0	0	0	0	0	0	0	0	0	0	0	0	0	0	0	0	0	0	0	0	0	83	0	0	0	0	0	0	0	0	0	0
16S.5.018.Z	0	0	0	0	0	0	0	0	0	0	0	0	0	0	0	0	0	0	0	0	0	0	0	0	0	0	0	0	0	0	0	0	0	0	0	0	0	0	43	0	0	0	0	0	0	0	0	0	0
16S.5.022.V2	0	0	0	0	0	0	0	0	0	0	0	0	0	0	0	0	0	0	0	0	0	0	0	0	0	0	0	0	0	0	0	0	0	0	0	0	0	0	0	0	0	0	0	21	0	0	0	0	0
16S.5.026.V2	0	0	0	0	0	0	0	0	0	0	0	0	0	0	0	0	0	0	0	0	0	0	0	0	0	0	0	0	0	0	0	0	0	0	0	0	0	0	0	0	0	0	0	0	0	0	0	0	0
16S.6.008	0	0	0	0	0	0	0	0	0	0	0	0	0	0	0	0	0	0	0	0	0	0	0	0	0	0	0	0	0	0	0	0	0	0	0	0	0	0	0	0	0	0	0	0	0	0	0	0	0
16S.6.012	0	0	0	0	0	0	0	0	0	0	0	0	0	0	0	0	0	0	0	0	0	0	0	47	0	0	0	0	0	0	0	0	0	0	0	0	0	0	0	0	0	0	0	0	0	0	0	0	0
16S.6.016	0	0	0	0	0	0	0	0	0	0	0	0	0	0	0	0	0	0	0	0	0	0	0	0	0	0	0	0	0	0	0	0	0	0	0	0	0	0	0	0	0	0	0	0	0	0	0	0	0
16S.6.020	0	0	0	0	0	0	0	0	0	0	0	0	0	0	0	0	0	0	0	0	0	0	0	0	0	0	0	0	0	0	0	0	0	0	0	0	0	0	0	0	0	0	0	0	50	0	0	0	0
16S.6.024	0	0	0	0	0	0	0	0	0	0	0	0	0	0	0	0	0	0	0	0	0	0	0	0	0	0	0	0	0	0	0	0	0	0	0	0	0	0	0	0	0	0	0	0	0	0	0	0	0
16S.7.008	0	0	0	0	0	0	0	0	0	0	0	0	0	0	0	0	0	0	0	0	0	0	0	0	0	0	0	0	0	0	0	0	0	0	0	0	0	0	0	0	0	0	0	16	0	0	0	0	0
16S.7.012	0	0	0	0	0	0	0	0	0	0	0	0	45	0	0	0	0	0	0	0	0	0	0	0	0	0	0	0	0	0	0	0	0	0	0	0	0	0	0	0	0	0	0	0	0	0	0	0	0
16S.7.016	0	0	0	0	0	0	0	0	0	0	0	0	0	0	0	0	0	0	0	0	0	0	0	0	0	0	0	0	0	0	0	0	0	0	0	0	0	0	0	0	0	0	0	0	0	0	0	0	0
16S.7.020	0	0	0	0	0	0	0	0	0	0	0	0	0	0	0	0	0	0	0	0	0	0	0	0	0	0	0	0	0	0	0	0	0	0	0	0	0	0	0	0	0	0	0	0	0	0	0	0	0
16S.7.024	0	0	0	0	0	0	0	0	0	0	0	0	0	0	0	0	0	0	0	0	0	0	0	0	0	0	0	0	0	0	0	0	0	0	0	0	0	0	0	0	0	20	0	0	0	0	0	0	0
16S.001.011Z	0	0	0	0	0	0	0	0	0	0	0	0	0	0	0	0	0	0	228	0	0	0	0	0	0	0	0	0	0	0	0	0	0	0	0	0	0	521	0	0	0	0	0	0	0	0	0	0	0
16S.001.018Z	0	0	0	0	0	0	0	0	0	0	0	0	0	0	0	0	0	0	0	0	0	0	0	0	0	0	0	0	0	0	0	0	0	0	0	0	0	0	0	0	0	0	0	0	0	0	0	0	0
16S.001.025Z	0	0	0	0	0	0	0	0	0	0	0	0	0	0	0	0	0	0	0	0	0	0	0	0	0	0	0	0	0	0	0	0	0	0	0	0	0	0	0	0	0	0	0	0	0	0	0	0	0
16S.001.032Z	0	0	0	0	0	0	0	0	0	0	0	0	0	0	0	0	0	0	0	0	0	0	0	0	0	0	0	0	0	0	0	0	0	0	0	0	0	0	0	0	0	0	0	0	0	0	0	0	0
16S.001.040Z	0	0	0	0	0	0	0	0	0	0	0	0	0	0	0	0	0	0	0	0	0	0	0	0	0	0	0	0	0	0	0	0	0	0	0	0	0	0	0	0	0	0	0	12	0	0	0	0	0
16S.001.070	0	0	0	0	0	0	0	0	0	0	0	0	0	0	0	0	0	0	0	0	0	0	0	0	0	0	0	0	0	0	0	0	0	0	0	0	0	0	0	0	0	0	0	14	0	80	0	0	0
16S.002.008	0	0	0	0	0	0	0	0	0	0	0	0	0	0	0	0	0	0	0	0	0	0	0	0	0	0	0	0	0	0	0	0	0	0	0	0	0	0	0	0	0	0	0	25	0	0	0	0	0
16S.002.012	0	0	0	0	0	0	0	0	0	0	0	0	0	0	0	0	0	0	0	0	0	0	0	0	0	0	0	0	0	0	0	0	0	0	0	0	0	0	0	0	0	0	0	0	0	0	0	0	0
16S.002.016	0	0	0	0	0	0	0	0	0	0	0	0	0	0	0	0	0	0	0	0	0	0	0	0	0	0	0	0	0	0	0	0	0	0	0	0	0	0	0	0	0	0	0	0	0	0	0	0	0
16S.002.020.Z	0	0	0	0	0	0	0	0	0	0	0	0	0	0	0	0	0	0	0	0	0	0	0	0	0	0	0	0	0	0	0	0	0	0	0	0	0	0	0	0	0	0	0	0	0	0	0	0	0
16S.002.024.Z	0	0	0	0	0	0	0	0	0	0	0	0	0	0	0	0	0	0	0	0	0	0	0	0	0	0	0	0	0	0	0	0	0	0	0	0	0	0	0	0	0	0	0	0	0	0	0	0	0
16S.002.067	0	0	0	0	0	0	0	0	0	0	0	0	0	0	0	0	0	0	0	0	0	0	0	0	0	0	0	0	0	0	0	0	0	0	0	0	0	0	0	0	0	0	0	99	0	0	0	0	0
16S.3.010.Z	0	0	0	0	0	0	0	0	0	0	0	0	0	0	0	0	0	0	0	0	0	0	0	0	0	0	0	0	0	0	0	0	0	0	0	0	0	0	0	0	0	0	0	145	0	32	0	0	0
16S.3.014.Z	0	0	0	0	0	0	0	0	0	0	0	0	0	0	0	0	0	0	0	0	0	0	0	0	0	0	0	0	0	0	0	0	0	0	0	19	0	0	0	0	0	0	0	0	0	0	0	0	0
16S.3.018.Z	0	0	0	0	0	0	0	0	0	0	0	0	0	0	0	0	0	0	0	0	0	0	0	0	0	0	0	0	0	0	0	0	0	0	108	0	0	0	0	0	0	0	0	0	0	0	0	0	0
16S.3.022.Z	0	0	123	48	144	27	32	95	0	0	24	0	0	92	0	0	0	0	0	0	0	0	0	0	0	0	0	0	0	0	0	0	0	0	0	0	0	279	0	53	36	0	0	0	0	0	0	0	0
16S.3.026.Z	0	0	0	0	0	0	0	0	0	0	0	0	0	0	0	0	0	0	0	0	0	0	0	0	0	0	0	0	0	0	0	0	0	0	0	0	0	0	0	0	0	0	0	0	0	0	0	0	0
16S.4.010.Z	0	0	0	0	0	0	0	0	0	0	0	0	0	0	0	0	0	0	0	0	0	0	0	0	64	0	0	0	0	0	0	0	0	0	0	0	0	0	0	0	0	0	0	950	0	0	0	0	0
16S.4.014.Z	0	0	0	0	0	0	0	0	0	0	0	0	0	0	0	0	0	0	0	0	0	0	0	0	0	0	0	0	0	0	0	0	0	0	0	0	0	0	0	0	0	0	0	206	0	0	0	0	0
16S.4.018.Z	0	0	0	0	0	0	0	0	0	0	0	0	0	0	0	0	0	0	0	0	0	0	0	0	0	0	0	0	0	0	0	31	0	0	0	0	0	0	0	0	0	0	0	58	0	0	0	0	0
16S.4.022.Z	0	0	0	0	0	0	0	0	0	0	0	0	0	0	0	0	0	0	0	0	0	0	0	0	0	0	0	0	0	0	0	0	0	0	0	0	0	0	0	0	0	0	0	0	0	0	0	0	0
16S.4.026.Z	0	0	0	0	0	0	0	0	0	0	0	0	0	0	0	0	0	0	0	0	0	0	0	0	0	0	0	0	0	0	0	0	0	0	0	0	0	0	0	0	0	0	0	0	0	0	0	0	0
16S.5.008.Z	0	0	0	0	0	0	0	0	0	0	0	0	0	0	0	0	0	0	0	0	0	0	0	0	0	0	0	0	0	0	0	0	0	0	0	0	0	0	0	0	0	0	0	167	0	0	0	0	0
16S.5.012.Z	0	0	0	0	0	0	0	0	0	0	0	0	0	0	0	0	0	0	0	0	0	0	0	0	0	0	0	0	0	0	0	0	0	0	0	0	0	0	0	0	0	0	0	0	0	0	0	0	0
16S.5.016.Z	0	0	0	0	0	0	0	0	0	0	0	0	0	0	0	0	0	0	0	0	0	0	0	0	0	0	0	0	0	0	0	0	0	0	0	0	0	0	0	0	0	0	0	0	0	0	0	0	0
16S.5.020.V2	0	0	0	0	0	0	0	0	0	0	0	0	0	0	0	0	0	0	0	0	0	0	0	0	0	0	0	0	0	0	0	0	0	0	0	0	0	0	0	0	0	0	0	0	0	0	0	0	0
16S.5.024.V2	0	0	0	0	0	0	0	0	0	0	0	0	0	0	0	0	0	0	0	0	0	0	0	0	0	0	0	0	0	0	0	0	0	0	0	0	0	0	0	0	0	0	0	40	0	0	0	0	0
16S.6.010	0	0	0	0	0	0	0	0	0	0	0	0	0	0	0	0	0	0	0	0	0	0	0	0	0	0	0	0	0	0	0	0	0	0	0	0	0	0	0	0	0	0	0	86	0	0	0	0	0
16S.6.014	0	0	0	0	0	0	0	0	0	0	0	0	0	0	0	0	0	0	0	0	0	0	0	0	0	0	0	0	0	0	0	0	0	0	0	0	0	0	0	0	0	0	0	0	0	0	0	0	0
16S.6.018	0	0	0	0	0	0	0	0	0	0	0	0	0	0	0	0	0	0	0	0	0	0	0	0	0	0	0	0	0	0	0	0	0	0	0	0	0	0	0	0	0	0	0	0	0	0	0	0	0
16S.6.022	0	0	0	0	0	0	0	0	0	0	0	0	0	0	0	0	0	0	0	0	0	0	0	0	0	0	0	0	0	0	0	0	0	0	0	0	0	0	0	0	0	0	0	0	0	0	0	0	0
16S.6.026	0	0	0	0	0	0	0	0	0	0	0	0	0	0	0	0	0	0	0	0	0	0	0	0	0	0	0	0	0	0	0	0	0	0	0	0	0	0	0	0	0	0	0	0	0	0	0	0	0
16S.7.010	0	0	0	0	0	0	0	0	0	0	0	0	0	0	0	0	0	0	0	0	0	0	0	0	0	0	0	0	0	0	0	0	0	0	0	0	0	0	0	0	0	0	0	36	0	0	0	0	0
16S.7.014	0	0	0	0	0	0	0	0	0	0	0	0	0	0	0	0	0	0	0	0	0	0	0	0	0	0	0	0	0	0	0	0	0	0	0	0	0	0	0	0	0	0	0	0	0	0	0	0	0
16S.7.018	0	0	0	0	0	0	0	0	0	0	0	0	0	0	0	0	0	0	0	0	0	0	0	0	0	0	0	0	0	0	0	0	0	0	0	0	0	0	0	0	0	0	0	0	0	0	0	0	0
16S.7.022	0	0	0	0	0	0	0	0	0	0	0	0	0	0	0	0	0	0	0	0	0	0	0	0	0	0	0	0	0	0	0	0	0	0	0	0	0	0	0	0	0	0	0	19	0	0	0	0	0
16S.7.026	0	0	0	0	0	0	0	0	0	0	0	0	0	0	0	0	0	0	0	0	0	0	0	0	0	0	0	0	0	0	0	0	0	0	0	0	0	0	0	0	0	0	0	0	0	0	0	0	0
16S.001.065.2	0	0	0	0	0	0	0	0	0	0	0	0	0	0	0	0	0	0	0	0	0	0	0	0	0	0	0	0	0	0	0	0	0	0	0	0	0	0	0	0	0	0	0	0	0	0	0	0	0
16S.001.087.2	0	0	0	0	0	0	0	0	0	0	0	0	0	0	0	0	0	0	0	0	0	0	0	0	0	0	0	0	0	0	0	0	0	0	0	0	0	0	0	0	0	0	0	0	0	753	0	0	0
16S.002.047.2	0	0	0	0	0	0	0	0	0	0	0	0	0	0	0	0	0	0	0	0	0	0	0	0	0	0	0	0	0	0	0	0	0	0	0	0	0	0	0	0	0	0	0	0	0	0	0	0	0
16S.002.059.2	0	0	0	0	0	0	0	0	0	0	0	0	0	0	0	0	0	0	0	0	0	0	0	0	0	0	0	0	0	0	0	0	0	0	0	0	0	0	0	0	0	0	0	0	0	0	0	0	0
16S.3.041.2.HZ	0	0	0	0	0	0	0	0	0	0	0	0	0	0	0	0	0	0	0	0	0	0	0	0	0	0	0	0	0	0	0	0	0	0	0	0	0	0	0	0	0	0	0	0	0	0	0	0	0
16S.4.041.2.HZ	0	0	0	0	0	0	0	0	0	0	0	0	0	0	0	0	0	0	0	0	0	0	0	0	0	0	0	0	0	0	0	0	0	0	0	0	0	0	0	0	0	0	0	0	0	0	0	0	0
16S.4.053.2.HZ	0	0	0	0	0	0	0	0	0	0	0	0	0	0	0	0	0	0	0	0	0	0	0	0	0	0	0	0	0	0	0	0	0	0	0	0	0	0	0	0	0	0	0	0	0	0	0	0	0
16S.5.047.2.HZ	0	0	0	0	0	0	0	0	0	0	0	0	0	0	0	0	0	0	0	0	0	0	0	0	0	0	0	0	0	0	0	0	0	0	0	0	0	0	0	0	0	0	0	0	0	0	0	0	0
16S.6.041.2.HZ	0	0	0	0	0	0	0	0	0	0	0	0	0	0	0	0	0	0	0	0	0	0	0	0	0	0	0	0	0	0	0	0	0	0	0	0	0	0	0	0	0	0	0	0	0	0	0	0	0
16S.6.053.2.HZ	0	0	0	0	0	0	0	0	0	0	0	0	0	0	0	0	0	0	0	0	0	0	0	0	0	0	0	0	0	0	0	0	0	0	0	0	0	0	0	0	0	0	0	0	0	0	0	0	0
16S.7.041.2.HZ	0	0	0	0	0	0	0	0	0	0	0	0	0	0	0	0	0	0	0	0	0	0	0	0	0	0	0	0	0	0	0	0	0	0	0	0	0	0	0	0	0	0	0	0	0	0	0	0	0
16S.7.053.2.HZ	0	0	0	0	0	0	0	0	0	0	0	0	0	0	0	0	0	0	0	0	0	0	0	0	0	0	0	0	0	0	0	0	0	0	0	0	0	0	0	0	0	0	0	0	0	0	0	0	0
16S.001.058.2	0	0	0	0	0	0	0	0	0	0	0	0	0	0	0	0	0	0	0	0	0	0	0	0	0	0	0	0	0	0	0	0	0	0	0	0	0	0	0	0	0	0	0	0	0	2541	0	0	0
16S.001.080.2	0	0	0	0	0	0	0	0	0	0	0	0	595	0	0	0	0	0	0	0	0	0	0	0	0	0	0	0	0	0	0	0	0	0	0	0	0	0	0	0	0	0	0	0	0	0	0	0	0
16S.002.041.2	0	0	0	0	0	0	0	0	0	0	0	0	0	0	0	0	0	0	0	0	0	0	0	0	0	0	0	0	0	0	0	0	0	0	0	0	0	0	0	0	0	0	0	0	0	0	0	0	0
16S.002.053.2	0	0	0	0	0	0	0	0	0	0	0	0	0	0	0	0	0	0	0	0	0	0	0	0	0	0	0	0	0	0	0	0	0	0	0	0	0	0	0	0	0	0	0	0	0	0	0	0	0
16S.3.047.2.HZ	0	0	0	0	0	0	0	0	0	0	0	0	0	0	0	0	0	0	0	0	0	0	0	0	0	0	0	0	0	0	0	0	0	0	0	0	0	0	0	0	0	0	0	0	0	0	0	0	0
16S.4.047.2.HZ	0	0	0	0	0	0	0	0	0	0	0	0	0	0	0	0	0	0	0	0	0	0	0	0	0	0	0	0	0	0	0	0	0	0	0	0	0	0	0	0	0	0	0	0	13	31	0	0	0
16S.4.059.2.HZ	0	0	0	0	0	0	0	0	0	0	0	0	0	0	0	0	0	0	0	0	0	0	0	0	0	0	0	0	0	0	0	0	0	0	0	0	0	0	0	0	0	0	0	0	0	0	0	0	0
16S.5.041.2.HZ	0	0	0	0	0	0	0	0	0	0	0	0	0	0	0	0	0	0	0	0	0	0	0	0	0	0	0	0	0	0	0	0	0	0	0	0	0	0	0	0	0	0	0	12	0	0	0	0	0
16S.6.047.2.HZ	0	0	0	0	0	0	0	0	0	0	0	0	0	0	0	0	0	0	0	0	0	0	0	0	0	0	0	0	0	0	0	0	0	0	0	0	0	0	0	0	0	0	0	0	0	0	0	0	0
16S.6.059.2.HZ	0	0	0	0	0	0	0	0	0	0	0	0	0	0	0	0	0	0	0	0	0	0	0	0	0	0	0	0	0	0	0	0	0	0	0	0	0	0	0	0	0	0	0	0	0	0	0	0	0
[truncated: 896 more columns]
